# Supplementary material for: Oxyresveratrol Inhibits R848-Induced Pro-Inflammatory Mediators Release by Human Dendritic Cells Even When Embedded in PLGA Nanoparticles
Source: MDPI journal article supplement (doi:10.3390/molecules26082106), 2021-04-07
Supplement: s1 [file s1]

## Supplementary Information for

# Oxyresveratrol inhibits R848-induced pro-inflammatory mediators release by human dendritic cells even when embedded in PLGA nanoparticles

Salvatore Calogero Gaglio <sup>1</sup>, Marta Donini <sup>2</sup>, Piyachat Evelyn Denbaes <sup>1</sup>, Stefano Dusi <sup>2\*</sup>, Massimiliano Perduca <sup>1\*</sup>

1 Department of Biotechnology, University of Verona, Strada Le Grazie 15, 37134 Verona, Italy.

2 Department of Medicine, Section of General Pathology, University of Verona, Strada Le Grazie 8, 37134, Verona, Italy

\* Correspondence: MP, [massimiliano.perduca@univr.it](mailto:massimiliano.perduca@univr.it), Tel.: +39 0458027984; SD, [stefano.dusi@univr.it](mailto:stefano.dusi@univr.it), Tel.: +39 0458027124

**Keywords:** dendritic cells, oxyresveratrol, cytokines, PLGA nanoparticles, inflammation

Number of pages: S1-S6

Number of Tables: Table S1-S2

Number of Figures: Figure S1-S3

**Table S1.** Comparison between DLS, AFM and Nanosight tracking analysis data for empty and oxyresveratrol loaded (PLGA[oxy]) nanoparticles.

| Nanoformulation | Z-average (nm) | Peak number (nm) | Afm diameter*(nm) | Nanosight tracking analysis (nm) |
|-----------------|----------------|------------------|-------------------|----------------------------------|
| Empty           | 170.2 ± 2.5    | 148.3 ± 43.0     | 165.0 ± 34.5      | 140.8 ± 25.0                     |
| PLGA[Oxy]       | 169.6 ± 3.5    | 140.5 ± 42.9     | 171.0 ± 58.7      | 139.3 ± 26.7                     |

\*The statistical analysis was performed over a population major than 100 particles using SPIP™ statistical tool.

**Table S2.** Comparison between encapsulation efficiency value calculated directly breaking the nanoparticles ( $EE_{\text{direct}}$ ) and the same value indirectly estimated ( $EE_{\text{indirect}}$ ). The results are expressed as the mean value of the percentage  $\pm$ SD of the initial amount of oxyresveratrol added to the reaction for three independent measures on three replica samples.

| <b>Nanoformulation</b> | <b><math>EE_{\text{direct}}</math> (%)</b> | <b><math>EE_{\text{indirect}}</math> (%)</b> |
|------------------------|--------------------------------------------|----------------------------------------------|
| PLGA[OXY]              | 43.75 $\pm$ 3.1                            | 45.47 $\pm$ 4.55                             |

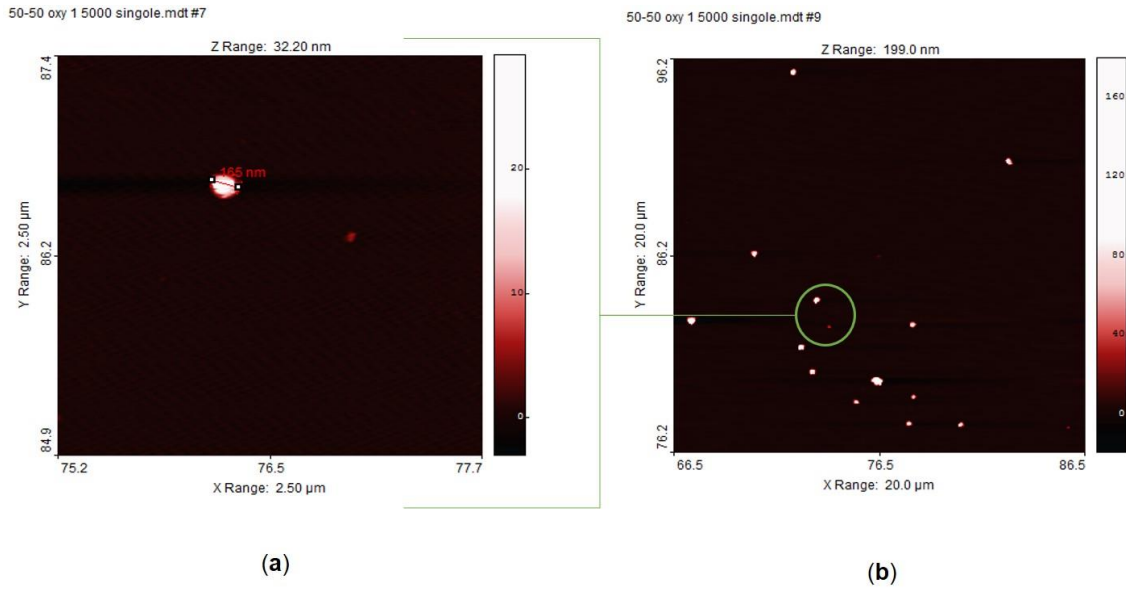

**Figure S1.** AFM image of a single oxyresveratrol-loaded PLGA nanoparticle with a resolution of 2.5x2.5  $\mu\text{m}$  (a). Image of several single loaded nanoparticles and an aggregate with a resolution of 20X20  $\mu\text{m}$  (b). The images were collected in intermittent mode.

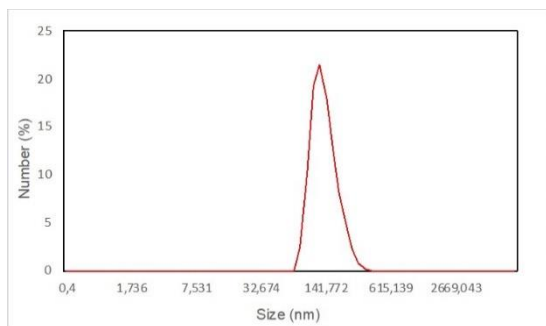

(a)

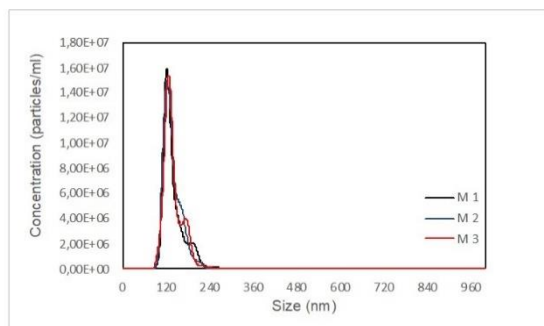

(b)

**Figure S2.** DLS Number diagram (a) and Nanosight tracking analysis diagram (b) of oxyresveratrol-loaded PLGA nanoparticles. Measurements were performed in triplicate.

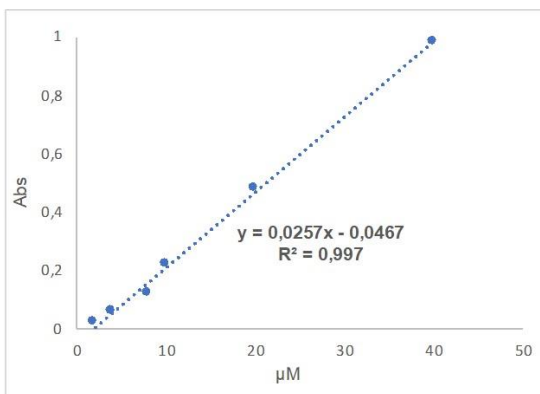

(a)

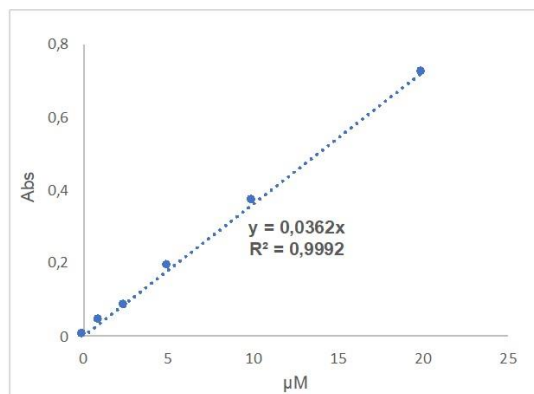

(b)

**Figure S3.** Calibration curve for oxyresveratrol in DMSO (a). Calibration curve for oxyresveratrol in aqueous solution (b).
